# Supplementary material
Source: PubMed Central journal article supplement (PMC7799303)
Supplement: awaa377_supplementary_data.pdf [file awaa377_supplementary_data.pdf]

The UCL Queen Square National Hospital for Neurology and Neurosurgery COVID-19 Study Group include the authors listed in the author list as well as the following: Tehmina Bharucha,<sup>1,2,3</sup> Dipa L. Jayaseelan,<sup>4,5</sup> Rhian E. Raftopoulos,<sup>6</sup> Laura Zambreanu,<sup>4,5</sup> Anthony Khoo,<sup>1</sup> Krishna Chinthapalli,<sup>4,7</sup> Elena Boyd,<sup>7</sup> Hatice Tuzlali,<sup>7</sup> Gary Price,<sup>1</sup> Benjamin McLoughlin,<sup>1</sup> Soon Tjin Lim,<sup>1</sup> Puja R. Mehta,<sup>1</sup> Viva Levee,<sup>1</sup> Stephen Keddie,<sup>4</sup> Wisdom Yong,<sup>8</sup> Gary Hotton,<sup>1</sup> Christopher Carswell,<sup>9,10</sup> Michael Yoong,<sup>11</sup> Jemeen Sreedharan,<sup>6</sup> Jonathan M. Schott,<sup>4</sup> Arvind Chandratheva,<sup>12</sup> Robert Simister,<sup>12</sup> Simon F. Farmer,<sup>1</sup> Francesco Carletti,<sup>13</sup> Catherine Houlihan<sup>1,14</sup> and Angela Vincent<sup>4,15</sup>

1 National Hospital for Neurology and Neurosurgery, University College London Hospitals NHS Foundation Trust, Queen Square, London, UK

2 Department of Biochemistry, University of Oxford, Oxford, UK

3 Lao-Oxford-Mahosot Hospital-Wellcome Trust-Research Unit, Mahosot Hospital, Vientiane, Laos

4 University College London, Queen Square Institute of Neurology, London, UK

5 Watford General Hospital, Watford, Hertfordshire, UK

6 King's College Hospital, Denmark Hill, London, UK

7 Wexham Park Hospital, Frimley Health NHS Foundation Trust, Berkshire, UK

8 Northwick Park Hospital, Harrow, London, UK

9 Imperial College Healthcare NHS Trust, London, UK

10 Chelsea and Westminster Hospital, London, UK

11 Barts and The London NHS Trust, London, UK

12 Stroke Research Centre, UCL Queen Square Institute of Neurology, London, UK

13 Lysholm Department of Neuroradiology, National Hospital for Neurology and Neurosurgery, University College London Hospitals NHS Foundation Trust, Queen Square, London, UK

14 UCL Division of Infection and Immunity, London, UK

15 University of Oxford, Nuffield Department of Clinical Neurosciences, John Radcliffe Hospital, Oxford, UK
